# Supplementary material
Source: MDPI journal article supplement (https://www.mdpi.com/2073-4344/13/10/1358)
Supplement: s1 [file s1]

# Supplementary information

## One-Pot Synthesis of Green-Emitting Nitrogen-Doped Carbon Dots from Xylose

Gabriela Rodríguez-Carballo <sup>1,\*</sup>, Cristina García-Sancho <sup>1</sup>, Manuel Algarra <sup>2</sup>, Eulogio Castro <sup>3</sup> and Ramón Moreno-Tost <sup>1,\*</sup>

- <sup>1</sup> Universidad de Málaga, Departamento de Química Inorgánica, Cristalografía y Mineralogía (Unidad Asociada al ICP-CSIC), Facultad de Ciencias, Campus de Teatinos, 29071 Málaga, Spain; cristinags@uma.es
- <sup>2</sup> INAMAT2-Institute for Advanced Materials and Mathematics, Department of Sciences, Public University of Navarre, Campus de Arrosadía, 31006 Pamplona, Spain; manuel.algarra@unavarra.es
- <sup>3</sup> Department Chemical, Environmental and Materials Engineering, Center for Advanced Studies in Earth Sciences, Energy and Environment (CEACTEMA), Universidad de Jaén, Campus las Lagunillas, 23071 Jaén, Spain; ecastro@ujaen.es
- \* Correspondence: gabrielarc@uma.es (G.R.-C.); rmtost@uma.es (R.M.-T.)

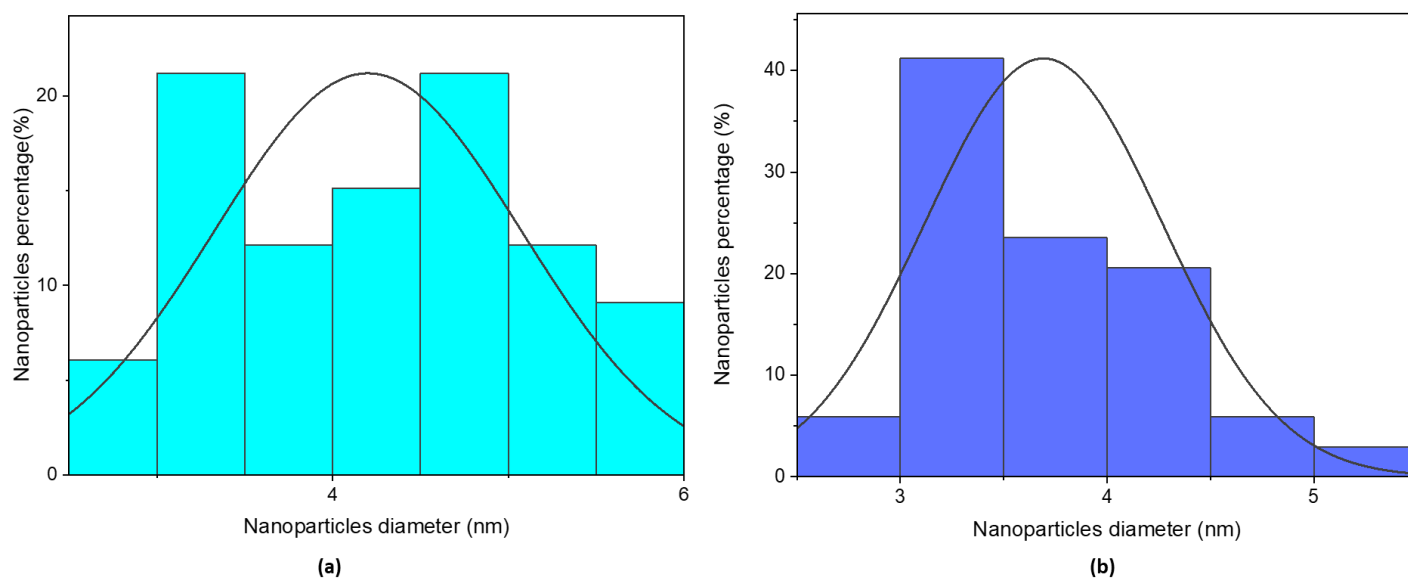

**Figure S1.** Size histograms of N-CDs synthesized using 100 mg VOPO<sub>4</sub> as catalyst, 0.75M of xylose as C precursor, NH<sub>4</sub>Cl as dopant and 17 g/L of CH<sub>3</sub>COOH at 180°C after 4h of reaction calculated from TEM images.

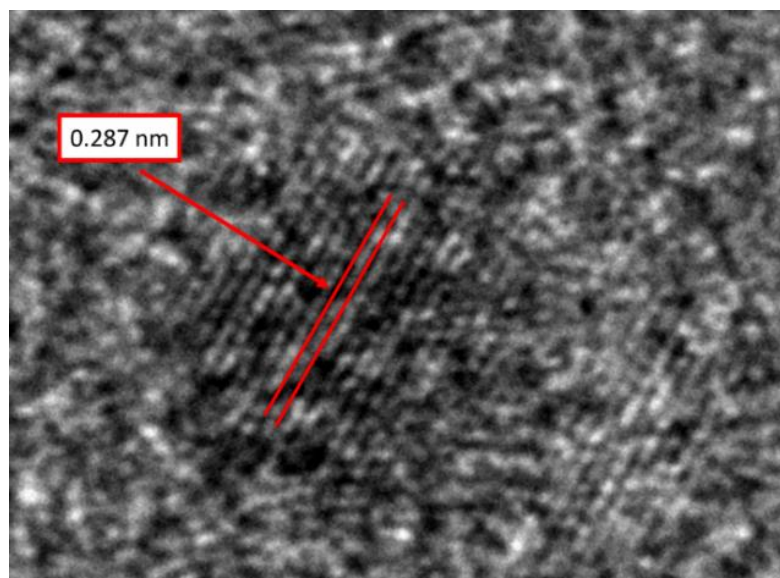

**Figure S2.** Graphitic spacing of N-CDs dialyzed solution samples synthesized using 100 mg  $\text{VOPO}_4$  as catalyst, 0.75M of xylose as C precursor,  $\text{NH}_4\text{Cl}$  as dopant and 17 g/L of  $\text{CH}_3\text{COOH}$  at  $180^\circ\text{C}$  after 4h of reaction.

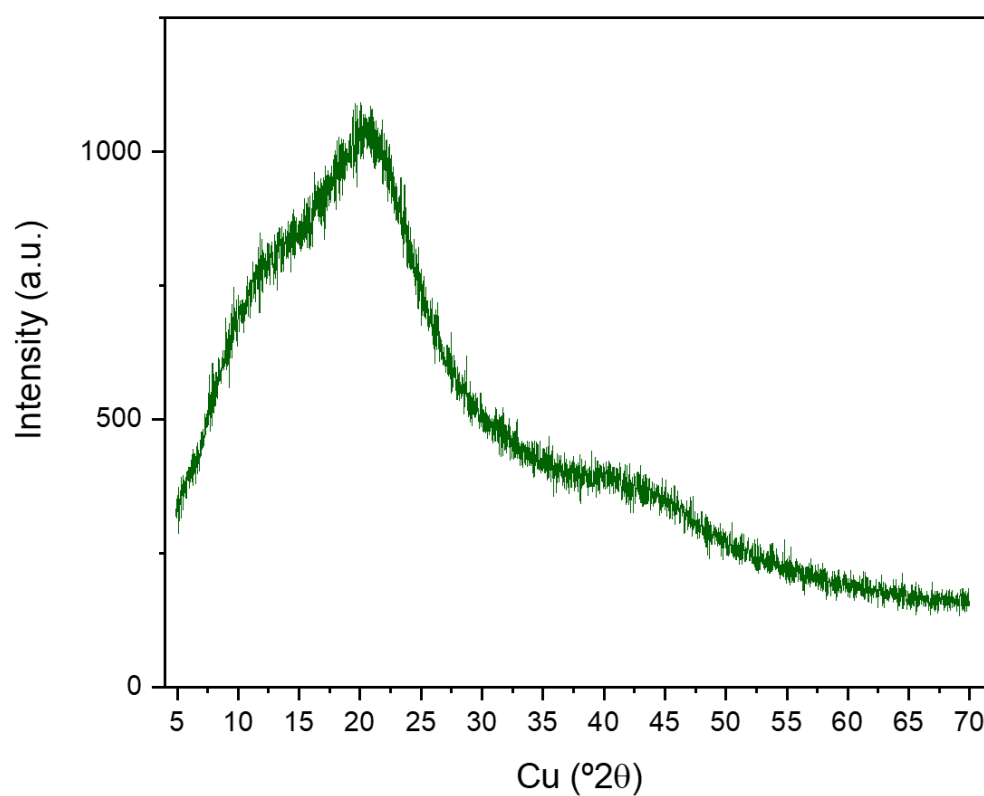

**Figure S3.** XRD pattern of dialyzed and lyophilized N-CDs synthesized using 100 mg  $\text{VOPO}_4$  as catalyst, 0.75M of xylose as C precursor,  $\text{NH}_4\text{Cl}$  as dopant and 17 g/L of  $\text{CH}_3\text{COOH}$  at  $180^\circ\text{C}$  after 4h of reaction.

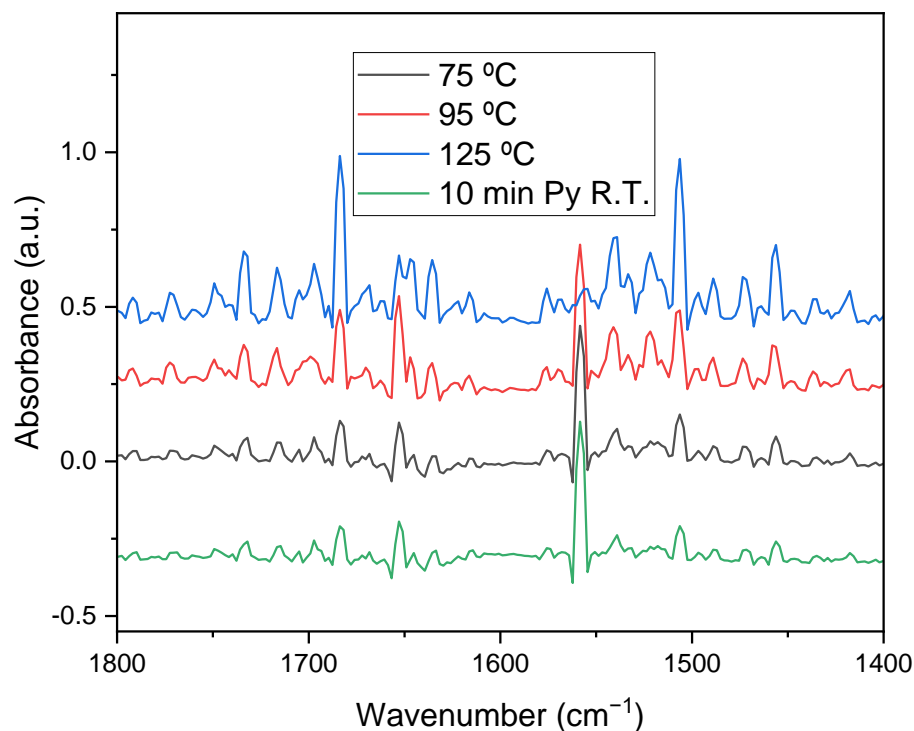

**Figure S4.** Spectra of the pyridine adsorption and desorption at different temperatures on VOPO<sub>4</sub> followed by FTIR.°

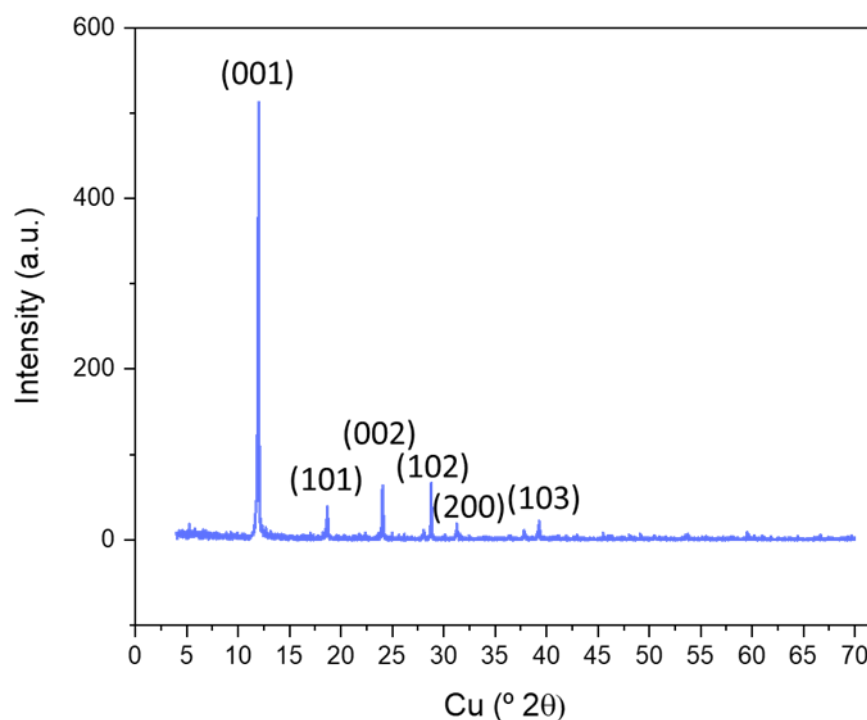

**Figure S5.** XRD pattern of freshly synthesized VOPO<sub>4</sub>.

The diffractogram of the vanadyl phosphate (Figure S5) presents only the characteristic and expected diffraction peaks of the α-VOPO<sub>4</sub>·2H<sub>2</sub>O (PDF: 00-036-1472), no other segregated phase being detected. The peak appearing at the lowest angle corresponds with the (001) plane [1] and in that direction the crystal size is 363 nm, determined according to the Scherrer equation.

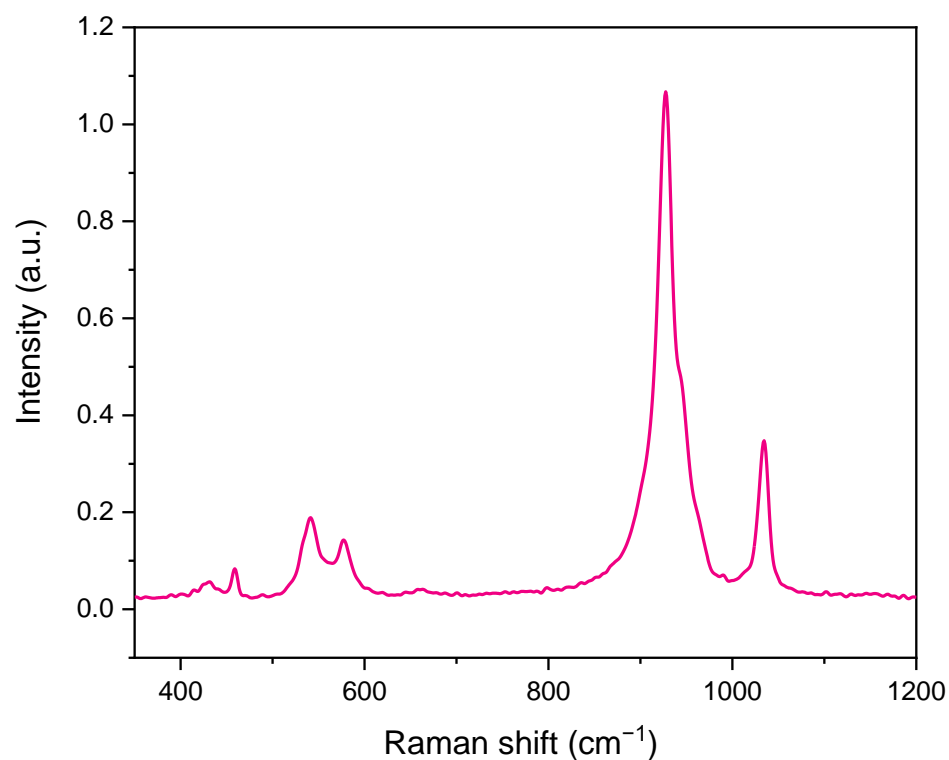

**Figure S6.** Raman spectrum of freshly synthesized VOPO<sub>4</sub>.

The Raman spectra of the vanadium (Figure S6) catalyst is similar to other published in bibliography [2, 3, 4, 5, 6]. Thus, the strong band at 925 cm<sup>-1</sup> is due to the symmetric stretching vibration of phosphate groups. In addition, the bands corresponding the symmetric bending vibrations at 536 and 576 cm<sup>-1</sup> are observed [2] (Trchová *et al.*,1999). Finally, the vanadyl stretching vibration lies on 1033 cm<sup>-1</sup>.

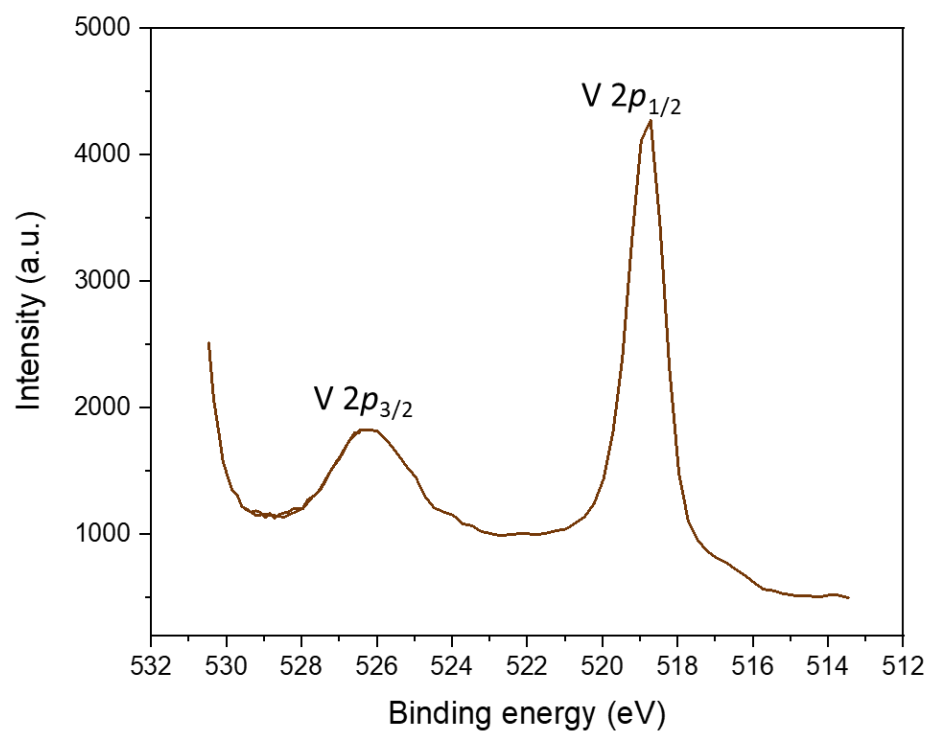

**Figure S7.** XPS spectrum of V 2p core level binding energy of freshly synthesized VOPO<sub>4</sub>.

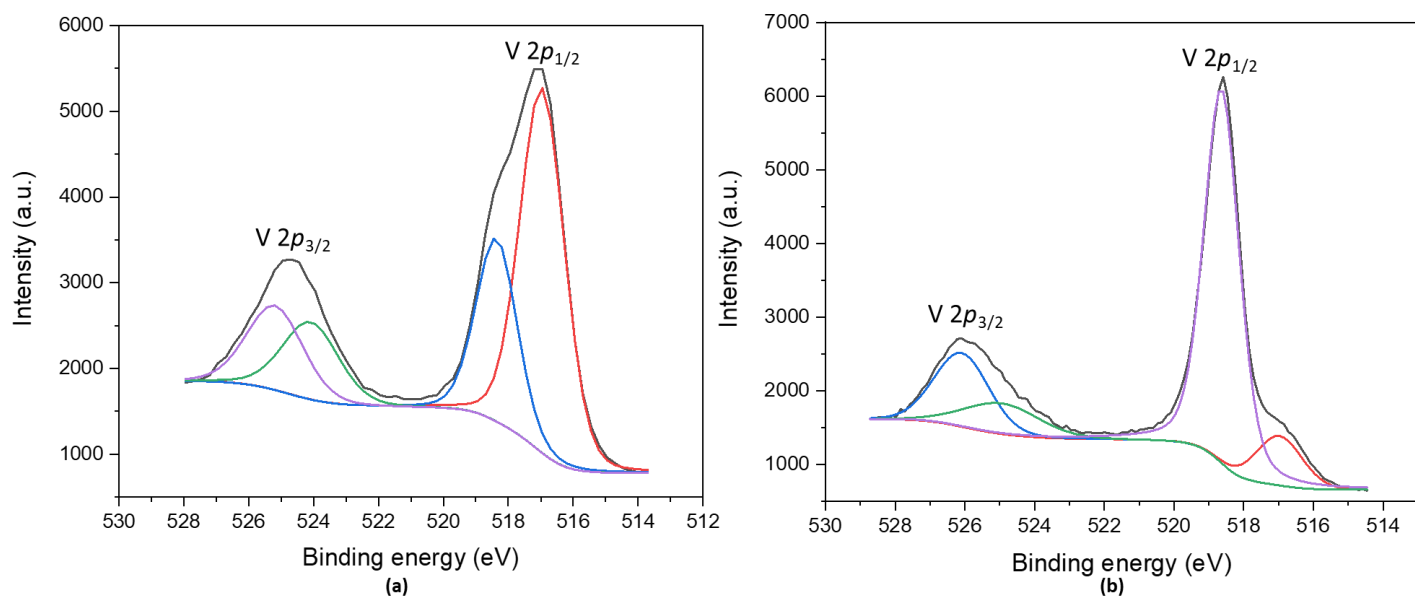

**Figure S8.** XPS spectra of V 2p core level binding energy of (a) VOPO<sub>4</sub> before reaction\* (b) VOPO<sub>4</sub> after reaction.

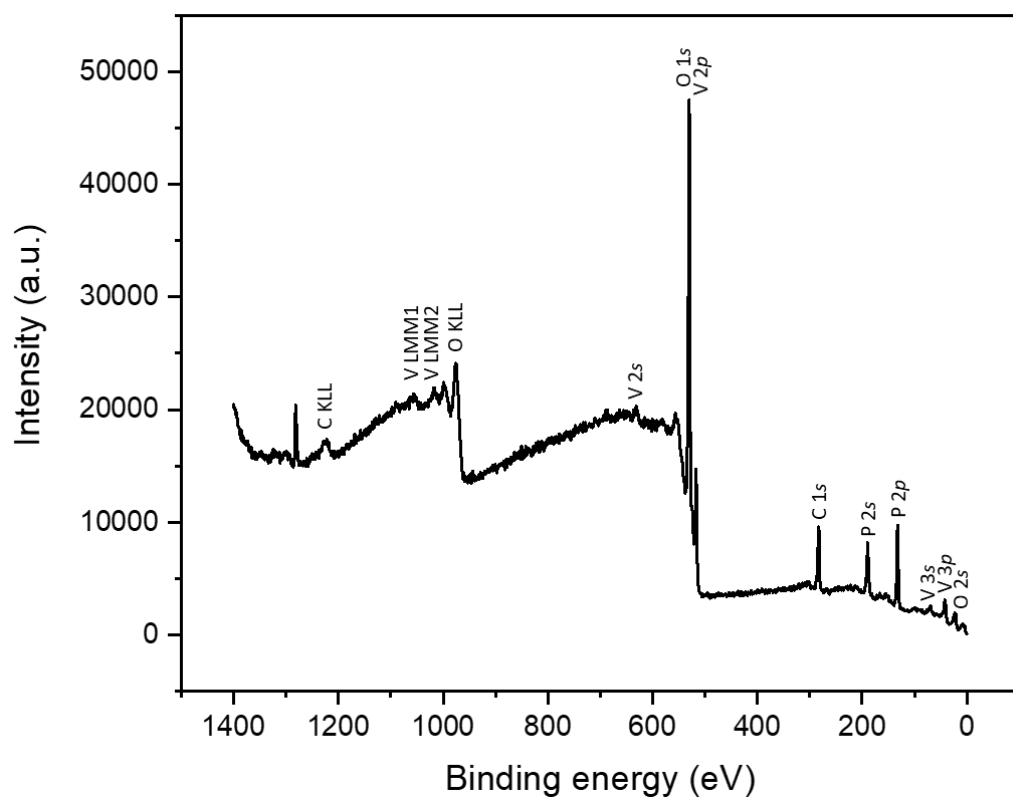

**Figure S9.** Survey XPS spectrum of freshly synthesized VOPO<sub>4</sub>.

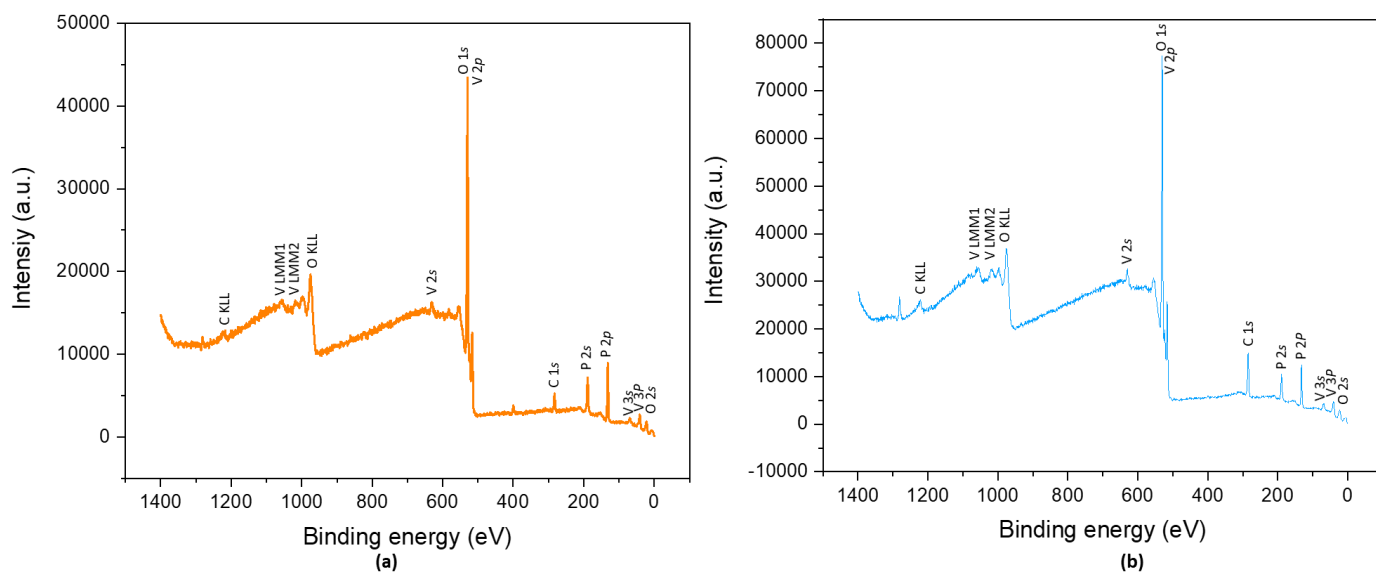

Figure S10. Survey spectra of (a) VOPO<sub>4</sub> before reaction\* (b) VOPO<sub>4</sub> after reaction.

Table S1. XPS atomic concentration of VOPO<sub>4</sub>.

| VOPO <sub>4</sub>     | C (1s) | O (1s) | P (2p) | V (2p) | V/P (XPS) |
|-----------------------|--------|--------|--------|--------|-----------|
| <b>Fresh</b>          | 16.76  | 64.23  | 13.89  | 13.12  | 0.94      |
| <b>After reaction</b> | 25.50  | 59.73  | 9.20   | 6.58   | 0.71      |

Table S2. XPS binding energy deconvoluted bands of VOPO<sub>4</sub>.

| VOPO <sub>4</sub>       | C1s (eV)      | O1s (eV)      | P2p (eV)      | V2p (eV)       | V species                      |
|-------------------------|---------------|---------------|---------------|----------------|--------------------------------|
| <b>Fresh</b>            | 284.8(61.12%) | 531.6(48.48%) | 133.7(28.58%) | 517.2 (3.66%)  | V(V) (2p <sub>1/2</sub> band)  |
|                         | 286.0(38.88%) | 533.0(51.52%) | 134.5(71.42%) | 518.8 (70.73%) | V(V) (2p <sub>1/2</sub> band)  |
| <b>Before* reaction</b> | 284.8(76.43%) |               |               |                |                                |
|                         | 286.3(14.44%) |               |               |                |                                |
|                         |               | 531.3(48.03%) | 133.5(22.75%) | 515.0(18.25%)  | V(IV) (2p <sub>1/2</sub> band) |
| <b>After reaction</b>   | 287.9(4.82%)  | 533.0(51.97%) | 134.6(77.25%) | 516.4(53.41%)  | V(V) (2p <sub>1/2</sub> band)  |
|                         | 289.3(4.31%)  |               |               |                |                                |
|                         | 283.1(26.43%) | 529.5(51.65%) | 133.9(32.68%) | 515.2(47.59%)  | V(IV) (2p <sub>1/2</sub> band) |
|                         | 284.7(42.16%) | 531.0(48.35%) | 134.0(67.32%) | 516.6(25.31%)  | V(V) (2p <sub>1/2</sub> band)  |
|                         | 286.2(31.42%) |               |               |                |                                |

\* Before reaction indicates that the catalyst and reactants have been brought into contact, but the reaction has not yet started.

Table S3. ICP-MS measurements of vanadium species in N-CDs dialyzed solutions.

| ICP-MS                    | V in N-CDs after 2h of reaction time | V in N-CDs after 4h of reaction time |
|---------------------------|--------------------------------------|--------------------------------------|
| μgV/g <sub>catalyst</sub> | 73                                   | 69                                   |

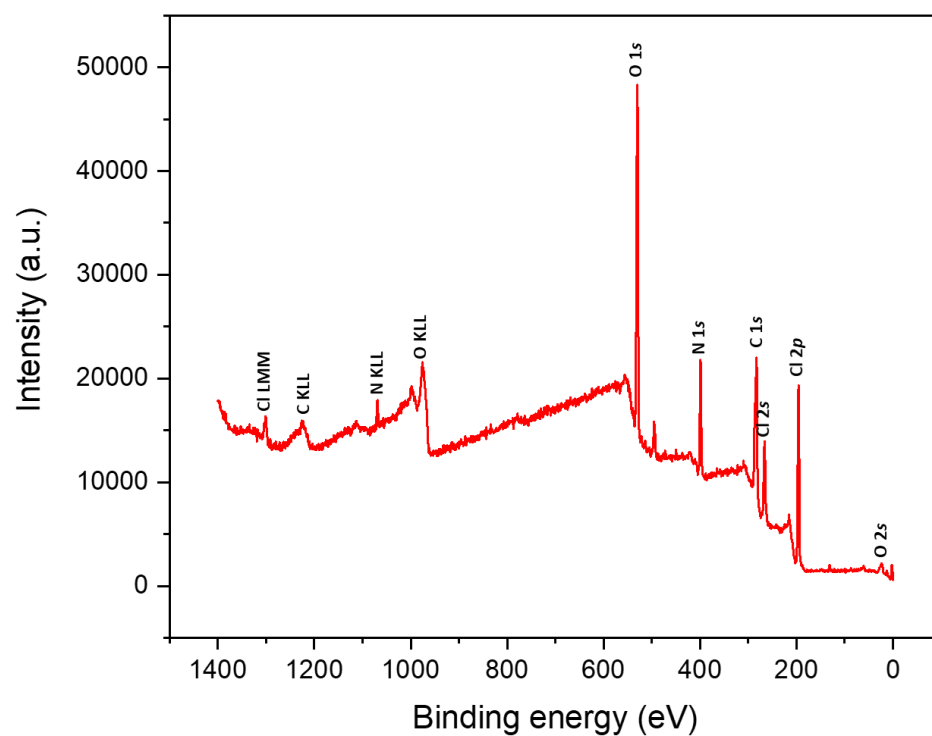

**Figure S11.** XPS survey spectrum of dialyzed and lyophilized N-CDs synthesized using 100 mg  $\text{VOPO}_4$  as catalyst, 0.75M of xylose as C precursor,  $\text{NH}_4\text{Cl}$  as dopant and 17 g/L of  $\text{CH}_3\text{COOH}$  at  $180^\circ\text{C}$  after 4h of reaction.

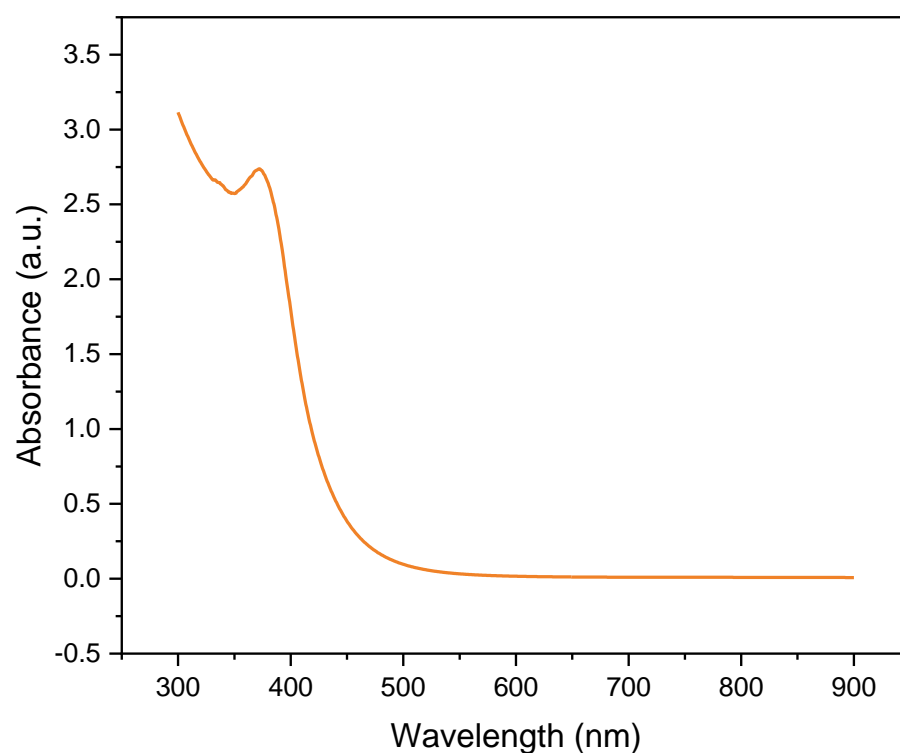

**Figure S12.** UV-vis spectrum of dialyzed N-CDs solution synthesized using 100 mg  $\text{VOPO}_4$  as catalyst, 0.75M of xylose as C precursor,  $\text{NH}_4\text{Cl}$  as dopant and 17 g/L of  $\text{CH}_3\text{COOH}$  at  $180^\circ\text{C}$  after 4h of reaction carried out from 300 nm to 900 nm. No dilution was performed prior to the analysis.

## References:

- 1 He, Y.; Yang, X.; Bai, Y.; Zhang, J.; Kang, L.; Lei, Z.; Liu, Z.-H. Vanadyl phosphate/reduced graphene oxide nanosheet hybrid material and its capacitance. *Electrochimica Acta* **2015**, *178*, 312–320, <https://doi.org/10.1016/j.electacta.2015.08.007>.
- 2 Trchová, M.; Čapková, P.; Matějka, P.; Melánová, K.; Beneš, L.; Uhlířová, E. Intercalation of Water into Anhydrous Vanadyl Phosphate Studied by the Infrared and Raman Spectroscopies. *J. Solid State Chem.* **1999**, *148*, 197–204, <https://doi.org/10.1006/jssc.1999.8431>.
- 3 De Luna, Y.; Bensalah, N. Synthesis, Characterization and Electrochemical Evaluation of Layered Vanadium Phosphates as Cathode Material for Aqueous Rechargeable Zn-ion Batteries. *Front. Mater.* **2021**, *8*, <https://doi.org/10.3389/fmats.2021.645915>.
- 4 Griesel, L.; Bartley, J.K.; Wells, R.P.K.; Hutchings, G.J. Preparation of vanadium phosphate catalysts from  $\text{VOPO}_4 \cdot 2\text{H}_2\text{O}$ : effect of  $\text{VOPO}_4 \cdot 2\text{H}_2\text{O}$  preparation on catalyst performance. *J. Mol. Catal. A: Chem.* **2004**, *220*, 113–119, <https://doi.org/10.1016/j.molcata.2004.02.027>.
- 5 Antonio, M.R.; Barbour, R.L.; Blum, P.R. Interlayer coordination environments of iron, cobalt, and nickel in vanadyl phosphate dihydrate,  $\text{VOPO}_4 \cdot 2\text{H}_2\text{O}$ , intercalation compounds. *Inorg. Chem.* **1987**, *26*, 1235–1243, <https://doi.org/10.1021/ic00255a012>.
- 6 Beneš, L.; Melánová, K.; Zima, V.; Trchová, M.; Čapková, P.; Koudelka, B. Vanadyl phosphate intercalated with dimethyl sulfoxide. *J. Phys. Chem. Solids* **2006**, *67*, 956–960, <https://doi.org/10.1016/j.jpcs.2006.01.009>.
